# Supplementary material
Source: publisher figshare collection journal article supplement (https://karger.figshare.com/ndownloader/files/31559243)
Supplement: Supplementary file 1 [file 31559243]

Supplement Table S1 Search strategy used to identify studies

| **MEDLINE** |
| --- |
| (“Mucocutaneous Lymph Node Syndrome”[Mesh] OR “Kawasaki Syndrome”[all fields] OR “Lymph Node Syndrome, Mucocutaneous”[all fields] OR “Kawasaki Disease”[all fields])AND ((“asthma”[MeSH Terms] OR “asthmas”[all fields] OR “bronchial asthma”[all fields] OR “asthma, bronchial"[all fields]) OR (“rhinitis”[MeSH Terms] OR “rhinitides”[all fields] OR “Nasal Catarrh”[all fields] OR “Catarrh, Nasal"[all fields] OR “Catarrhs, Nasal"[all fields] OR “Nasal Catarrhs"[all fields]) OR (“dermatitis, atopic”[MeSH Terms] OR “atopic dermatitides”[all fields] OR “atopic dermatitis”[all fields] OR “dermatitides, atopic"[all fields] OR “neurodermatitis,atopic”[all fields] OR “atopic neurodermatitides”[all fields] OR “atopic neurodermatitis”[all fields] OR “neurodermatitides, atopic”[all fields] OR “neurodermatitis, disseminated”[all fields] OR “disseminated neurodermatitides”[all fields] OR “disseminated neurodermatitis”[all fields] OR “neurodermatitides, disseminated”[all fields] OR “eczema, atopic”[all fields] OR “atopic eczema”[all fields] OR “eczema, infantile”[all fields] OR “infantile eczema”[all fields]) OR (“Conjunctivitis, Allergic”[Mesh] OR “Conjunctivitis, Atopic”[all fields] OR “Atopic Conjunctivitides”[all fields] OR “Atopic Conjunctivitis”[all fields] OR “Conjunctivitides, Atopic”[all fields] OR “Allergic Conjunctivitis”[all fields] OR “Allergic Conjunctivitides"[all fields] OR “Conjunctivitides, Allergic"[all fields] OR “Conjunctivitis, Vernal”[all fields] OR “Conjunctivitides, Vernal”[all fields] OR “Vernal Conjunctivitides”[all fields] OR “Keratoconjunctivitis, Vernal”[all fields] OR “Keratoconjunctivitides, Vernal”[all fields] OR “Vernal Keratoconjunctivitides”[all fields] OR “Vernal Keratoconjunctivitis”[all fields] OR “Conjunctivitis, Giant Papillary”[all fields] OR “Conjunctivitides, Giant Papillary”[all fields] OR “Giant Papillary Conjunctivitides”[all fields] OR “Giant Papillary Conjunctivitides”[all fields]OR “Giant Papillary Conjunctivitis”[all fields] OR “Papillary Conjunctivitides, Giant”[all fields] OR “Papillary Conjunctivitis, Giant”[all fields]) OR allerg∗ OR atop∗) |
| **EMBASE** |
| #1. 'mucocutaneous lymph node syndrome'/exp  #2. 'asthma'/exp  #3. 'rhinitis'/exp  #4. 'allergic conjunctivitis'/exp  #5. 'atopic dermatitis'/exp  #6. allerg*  #7. atop*  #8. #2 OR #3 OR #4 OR #5 OR #6 OR #7  #9. #1 AND #8 |

Supplement Table S2 Detailed risk of bias based on Newcastle Ottawa Scale (NOS) and Agency for Healthcare Research and Quality (AHRQ)

| **First author, publication year** | **Confounders** | **Selection of participants** | | **Misclassification of variables** | | | | | | | | **Bias due to missing data** | | **Reverse causation** |
| --- | --- | --- | --- | --- | --- | --- | --- | --- | --- | --- | --- | --- | --- | --- |
| **Participation bias** | **Selection of controls** | **Exposure** | | | | **Outcome** | | | | **Differential loss to follow up** | **Exclusion of individuals with missing data** |
| **Differential** | | | **Non-differential** | **Differential** | | | **Non-differential** |
| **Recall bias** | **Observer bias** | **Ascertainment bias** | **Recall bias** | **Observer bias** | **Ascertainment bias** |
| **Brosius, 1988 1** | Low: adjusted for age and time between clinic visit and interview | High: participants have responded to invitation | Low: selected from same population as cases | High: self-reported (telephone survey) | Low: exposure status defined by observer blinded to outcome status | Low: ascertainment of outcome unlikely to be influenced by exposure status | High: relies on routine medical care | High: self-reported | Unclear | Low: ascertainment of outcome unlikely to be influenced by exposure status | Moderate: non-validated method; diagnostic codes from registries used | Unclear | Unclear | Moderate: case-control study |
| **Matsuoka, 1997 2** | Low: adjusted for age, sex, and other confounders | High: participants have responded to questionnaires sent out and collected by the  School teachers | High: participants have responded to questionnaires was sent out and collected by Parents of Children with KD | High: self-reported | Low: exposure status defined by observer blinded to outcome status | Low: ascertainment of outcome unlikely to be influenced by exposure status | High: relies on routine medical care | High: self-reported | Moderate: Self-reported outcome | Low: ascertainment of outcome unlikely to be influenced by exposure status | Moderate: non-validated method; diagnostic codes from registries used | N/A as case-control design | High: Case-control study; did not included patients with missing data | Moderate: case-control study |
| **Webster, 2011 3** | Low: adjusted for age, sex, and other confounders | Low: automated participation | Low: selected from same population as cases | Low: structured record (data from WADLS) | Low: exposure status defined by observer blinded to outcome status | Low: ascertainment of outcome unlikely to be influenced by exposure status | High: relies on routine medical care | Low: structured record (data from WADLS) | Low: structured record | Low: ascertainment of outcome unlikely to be influenced by exposure status | Moderate: non-validated method; diagnostic codes from registries used | N/A as case-control design | High: Case-control study; did not included patients with missing data | Moderate: case-control study |
| **Liew, 2011 4** | Low: adjusted for age, sex, and other confounders | High: recruitment from KK Women’s and Children’s Hospital  and National University Hospital. | Low: selected from healthy sibling | Low: self-reported | Low: exposure status defined by observer blinded to outcome status | Low: ascertainment of outcome unlikely to be influenced by exposure status | High: relies on routine medical care | Low: examination by a paediatric allergist and  skin prick test evaluation | Low: structured record | Low: ascertainment of outcome unlikely to be influenced by exposure status | Moderate: non-validated method; diagnostic codes from registries used | N/A as cross-sectional design | Unclear: no mention of missing data | High: cross-sectional design |
| **Masood, 2012 5** | Unclear: no detail on how age was adjusted for | Low: automated participation | Low: selected from same population as cases | Low: structured record | Low: exposure status defined by observer blinded to outcome status | Low: ascertainment of outcome unlikely to be influenced by exposure status | High: relies on routine medical care | High: relies on routine medical care | Low: structured record | Low: ascertainment of outcome unlikely to be influenced by exposure status | Moderate; non-validated method; diagnostic codes from registries used | Unclear | Unclear | Moderate: case-control study |
| **Hwang, 20136** | Low: adjusted for age, sex, and other confounders | Low: automated participation | Low: selected from same population as cases | Low: structured record | Low: structured interview, survey not specifically designed to answer this question | Low: ascertainment of outcome unlikely to be influenced by exposure status | High: relies on routine medical care | Low: structured record from the National Health Insurance Research Database of Taiwan | Low: structured record | Low: ascertainment of outcome unlikely to be influenced by exposure status | Moderate: non-validated method; diagnostic codes from registries used | N/A as case-control design | High: Case-control study; did not included patients with missing data | Moderate: case-control study |
| **Tsai, 2013 7** | Low: adjusted for age, sex, and other confounders | Low: automated participation | Low: selected from same population as cases | Low: structured record | Low: structured interview, survey not specifically designed to answer this question | Low: ascertainment of outcome unlikely to be influenced by exposure status | High: relies on routine medical care | Low: structured record | Low: Outcome status defined by blinded observer to exposure status | Low: ascertainment of outcome unlikely to be influenced by exposure status | Moderate: non-validated method; diagnostic codes from registries used | N/A as case-control design | High: Case-control study; did not included patients with missing data | Moderate: case-control study |
| **Kuo, 2013 8** | Low: adjusted for age, sex, and other confounders | Low: automated participation | Low: selected at random from same population as cases | Low: structured record | Low: exposure status defined by observer blinded to outcome status | Low: method of data collection unlikely to affect results | High: relies on routine medical care | Low: structured record | Low: Outcome status defined by blinded observer to exposure status | Low: ascertainment of outcome unlikely to be influenced by exposure status | Moderate: non-validated method; diagnostic codes from registries used | Low: automated follow up | Low: authors state almost complete information available | Low: cohort study |
| **Peng, 2013 9** | Low: adjusted for age, sex, and other confounders | Low: automated participation | Low: selected from same population as cases | Low: structured record | Low: structured interview, survey not specifically designed to answer this question | Low: ascertainment of outcome unlikely to be influenced by exposure status | High: relies on routine medical care | Low: structured record | Low: structured record | Low: ascertainment of outcome unlikely to be influenced by exposure status | Moderate: non-validated method; diagnostic codes from registries used | N/A as cross-sectional design | Unclear: no mention of missing data | High: cross-sectional design |
| **Peng, 2013 9** | Low: adjusted for age, sex, and other confounders | Low: automated participation | Low: selected from same population as cases | Low: structured record | Low: structured interview, survey not specifically designed to answer this question | Low: ascertainment of outcome unlikely to be influenced by exposure status | High: relies on routine medical care | Low: all AD cases ICD-9 code was assigned by pediatrician  or dermatologist | Low: structured record | Low: ascertainment of outcome unlikely to be influenced by exposure status | Moderate: non-validated method; diagnostic codes from registries used | N/A as cross-sectional design | Unclear: no mention of missing data | Low: cohort study |
| **Wei, 2014 10** | Low: adjusted for age, sex, and other confounders | Low: automated participation | Low: selected at random from same population as cases | Low: structured record | Low: exposure status defined by observer blinded to outcome status | Low: method of data collection unlikely to affect results | High: relies on routine medical care | Low: structured record | Low: Outcome status defined by blinded observer to exposure status | Low: ascertainment of outcome unlikely to be influenced by exposure status | Moderate: non-validated method; diagnostic codes from registries used | Low: automated follow up | Low: authors state almost complete information available | Low: cohort study |
| **Hassidim, 2016 11** | Low: adjusted for age, sex, and other confounders | Low: automated participation | Low: selected from same population as cases | Low: structured record | Low: exposure status defined by observer blinded to outcome status | Low: ascertainment of outcome unlikely to be influenced by exposure status | High: relies on routine medical care | Low: structured record | Low: structured record | Low: ascertainment of outcome unlikely to be influenced by exposure status | Moderate: non-validated method; diagnostic codes from registries used | N/A as cross-sectional design | Unclear: no mention of missing data | High: cross-sectional design |
| **Kuo, 2016 12** | Low: adjusted for age, sex, and other confounders | Low: automated participation Low: selected at random from same population as cases | Low: automated participation Low: selected at random from same population as cases | Low: structured record | Low: exposure status defined by observer blinded to outcome status | Low: method of data collection unlikely to affect results | High: relies on routine medical care | Low: structured record | Low: Outcome status defined by blinded observer to exposure status | Low: ascertainment of outcome unlikely to be influenced by exposure status | Moderate:non-validated method; diagnostic codes from registries used | Low: automated follow up | Low: authors state almost complete information available | Low: cohort study |
| **Choi, 2019 13** | Unclear | Unclear | Low: selected from same population as cases | Low: structured record | Low: exposure status defined by observer blinded to outcome status | Low: ascertainment of outcome unlikely to be influenced by exposure status | High: relies on routine medical care | Low: structured record | Unclear | Low: ascertainment of outcome unlikely to be influenced by exposure status | Moderate: non-validated method; diagnostic codes from registries used | N/A as case-control design | High: Case-control study; did not included patients with missing data | Moderate: case-control study |

1. Brosius CL, Newburger JW, Burns JC, Hojnowski-Diaz P, Zierler S, Leung DY. Increased prevalence of atopic dermatitis in Kawasaki disease. *The Pediatric infectious disease journal.* 1988;7(12):863-866.

2. Matsuoka S, Tatara K, Nakagawa R, Mori K, Kuroda Y. Tendency toward atopy in Kawasaki disease. *European journal of pediatrics.* 1997;156(1):30-32.

3. Webster R, Carter K, Warrington N, et al. Hospitalisation with infection, asthma and allergy in Kawasaki disease patients and their families: genealogical analysis using linked population data. *PloS one.* 2011;6(11):e28004.

4. Liew W, Lim C, Tan T, et al. The effect of Kawasaki disease on childhood allergies - a sibling control study. *Pediatric allergy and immunology : official publication of the European Society of Pediatric Allergy and Immunology.* 2011;22(5):488-493.

5. Poster Abstracts. Pediatrics International. 2012;54(s1):63-135.

6. Hwang C, Hwang Y, Chen Y, et al. Atopic diathesis in patients with Kawasaki disease. *The Journal of pediatrics.* 2013;163(3):811-815.

7. Tsai Y, Lin C, Fu L, Fu Y, Lin M, Jan S. The association between Kawasaki disease and allergic diseases, from infancy to school age. *Allergy and asthma proceedings.* 2013;34(5):467-472.

8. Kuo H, Chang W, Yang K, et al. Kawasaki disease and subsequent risk of allergic diseases: a population-based matched cohort study. *BMC pediatrics.* 2013;13:38.

9. Woon P, Chang W, Liang C, et al. Increased risk of atopic dermatitis in preschool children with kawasaki disease: a population-based study in taiwan. *Evidence-based complementary and alternative medicine : eCAM.* 2013;2013:605123.

10. Wei C, Lin C, Kao C, et al. Increased risk of Kawasaki disease in children with common allergic diseases. *Annals of epidemiology.* 2014;24(5):340-343.

11. Hassidim A, Merdler I, Chorin O, et al. Atopic Predilection among Kawasaki Disease Patients: A Cross-Sectional Study of 1,187,757 Teenagers. *International archives of allergy and immunology.* 2016;170(2):92-96.

12. Kuo H, Chang W, Wang L, Li S, Chang W. Association of Attention deficit hyperactivity disorder and Kawasaki disease: a nationwide population-based cohort study. *Epidemiology and psychiatric sciences.* 2016;25(6):573-580.

13. Choi BS, Nikoyan E, Wi C-I, et al. Atopic Asthma as an Unrecognized Risk Factor for Kawasaki Disease: A Population-Based Case-Control Study. *Journal Of Allergy And Clinical Immunology.* 2019;143(2):AB106-AB106.
